# Supplementary material for: Time-Dependent Changes in Hepatic Sphingolipid Accumulation and PI3K/Akt/mTOR Signaling Pathway in a Rat Model of NAFLD
Source: MDPI journal article supplement (doi:10.3390/ijms222212478), 2021-11-19

**Figure S1.** The total expression of (A) glucose transporter 2 (GLUT2) in the liver homogenates. The protein expression was measured using the Western blot technique and presented as a percentage difference compared to the control group, which was set as 100%. The data are presented as mean  $\pm$  SD and based on  $n = 6$  rats per group in each week of the high-fat diet (HFD). \*  $p < 0.05$  significant difference vs. control group (0 week).

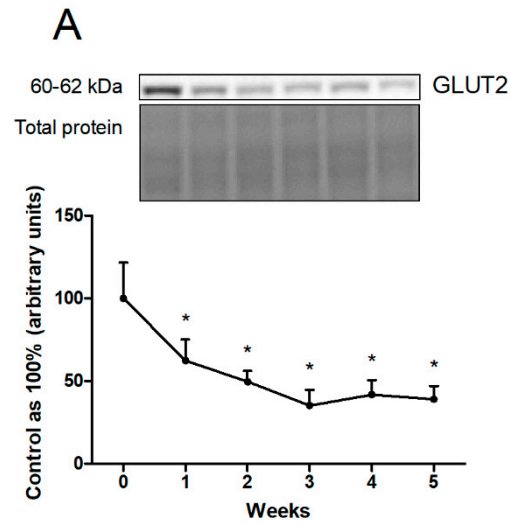

Supplement: s1 [file s1]
